# Supplementary material for: Does the East Greenland Current exist in northern Fram Strait?
Source: Copernicus journal article supplement (doi:10.5194/os-2018-54), 2018-05-28
Supplement: Supplementary file 1 [file os-2018-54-supplement.zip]

Archive with 3 entries (3 files):
- S2.pdf
- SupplementaryMaterialsFigureCaptions.pdf
- S1.pdf
